# Supplementary material for: First Data in the Process of Validating a Tool to Evaluate Knowledge, Attitude, and Practice of Healthcare Providers in Oral Care of Institutionalized Elderly Residents: Content Validity, Reliability and Pilot Study
Source: MDPI journal article supplement (doi:10.3390/ijerph18084145), 2021-04-14
Supplement: s1 [file s1]

Table S1

**Survey of knowledge, attitude, and practice of healthcare workers in oral care of elderly of long-term care institutions**

| <b>I. Knowledge</b><br>According to my understanding, ... |                                                                                                                          | <b>Yes</b> | <b>No</b> | <b>Don't know</b> |
|-----------------------------------------------------------|--------------------------------------------------------------------------------------------------------------------------|------------|-----------|-------------------|
| <b>1</b>                                                  | Oral health is directly related to general health.                                                                       |            |           |                   |
| <b>2</b>                                                  | Fluorides can help protect dental health.                                                                                |            |           |                   |
| <b>3</b>                                                  | Toothbrushing should be done in the morning after waking up and before bed at night every day.                           |            |           |                   |
| <b>4</b>                                                  | Sugary food, eg candy, increases the risk of tooth decay in residents.                                                   |            |           |                   |
| <b>5</b>                                                  | Dental plaque can cause gum diseases and dental caries.                                                                  |            |           |                   |
| <b>6</b>                                                  | Medication is one of the common reasons for dry mouth.                                                                   |            |           |                   |
| <b>7</b>                                                  | Dry mouth increases the risk of oral problems.                                                                           |            |           |                   |
| <b>8</b>                                                  | Interdental cleaning aids, such as dental floss and interdental brush, can be used to clean the adjacent tooth surfaces. |            |           |                   |
| <b>9</b>                                                  | Mouth rinsing can replace toothbrushing.                                                                                 |            |           |                   |
| <b>10</b>                                                 | It is normal that the residents feel toothache and sores in their mouth.                                                 |            |           |                   |
| <b>11</b>                                                 | Denture can totally replace natural teeth.                                                                               |            |           |                   |
| <b>12</b>                                                 | Denture should be taken out at night, cleaned and soaked.                                                                |            |           |                   |
| <b>13</b>                                                 | It is normal to lose teeth as one gets old.                                                                              |            |           |                   |
| <b>14</b>                                                 | Unfit denture may indicate serious oral problems.                                                                        |            |           |                   |
| <b>15</b>                                                 | Annual dental check is as important as body check.                                                                       |            |           |                   |
| <b>16</b>                                                 | Dental plaque does not form on denture.                                                                                  |            |           |                   |
| <b>17</b>                                                 | Residents with no teeth need to have dental check regularly.                                                             |            |           |                   |
| <b>18</b>                                                 | The residents with full denture only need mouth rinsing.                                                                 |            |           |                   |
| <b>19</b>                                                 | Residents with tubing for feeding need oral care.                                                                        |            |           |                   |

| II. Attitude                |                                                                                                             | Strongly disagree  Strongly agree |   |   |   |   |
|-----------------------------|-------------------------------------------------------------------------------------------------------------|----------------------------------------------------------------------------------------------------------------------|---|---|---|---|
| Upon my opinion, I think... |                                                                                                             | 1                                                                                                                    | 2 | 3 | 4 | 5 |
| 1                           | Daily oral care is an essential procedure.                                                                  |                                                                                                                      |   |   |   |   |
| 2                           | Independent residents should clean their dentures by themselves.                                            |                                                                                                                      |   |   |   |   |
| 3*                          | When I am busy, I tend to ignore oral care to residents.                                                    |                                                                                                                      |   |   |   |   |
| 4*                          | Oral care is an unpleasant task.                                                                            |                                                                                                                      |   |   |   |   |
| 5                           | Oral care training for residents can improve my practice skills.                                            |                                                                                                                      |   |   |   |   |
| 6*                          | I would perform other care procedures instead of oral care procedures to the residents.                     |                                                                                                                      |   |   |   |   |
| 7*                          | It is normal if the gum bleeds while doing oral care to a resident. There is usually no need to follow up.  |                                                                                                                      |   |   |   |   |
| 8*                          | I will only perform oral care to residents who are willing to open their mouth.                             |                                                                                                                      |   |   |   |   |
| 9                           | Oral care to residents is my duty.                                                                          |                                                                                                                      |   |   |   |   |
| 10                          | I will assist residents to perform care if they have difficulty.                                            |                                                                                                                      |   |   |   |   |
| 11*                         | I am willing to spend time on oral care for each resident.                                                  |                                                                                                                      |   |   |   |   |
| 12                          | If a resident requests to see a dentist, I am responsible to arrange for making corresponding arrangements. |                                                                                                                      |   |   |   |   |
| 13                          | The outreach dentist programme is helpful in assisting us to deliver oral care to the residents.            |                                                                                                                      |   |   |   |   |

| III. Practice<br>In the past 3 months, ... |                                                                                                          | Strongly disagree  Strongly agree |   |   |   |   |
|--------------------------------------------|----------------------------------------------------------------------------------------------------------|----------------------------------------------------------------------------------------------------------------------|---|---|---|---|
|                                            |                                                                                                          | 1                                                                                                                    | 2 | 3 | 4 | 5 |
| 1                                          | I will assist all residents in their toothbrushing or wiping their mouths at least once in my shift.     |                                                                                                                      |   |   |   |   |
| 2                                          | While I am performing oral care, I will brush the resident's teeth.                                      |                                                                                                                      |   |   |   |   |
| 3                                          | While I am performing oral care, I will brush the margin between teeth and gum.                          |                                                                                                                      |   |   |   |   |
| 4                                          | While I am performing oral care, I will brush the resident's tongue.                                     |                                                                                                                      |   |   |   |   |
| 5                                          | I use interdental brush to clean adjacent tooth surfaces for residents with large space between teeth.   |                                                                                                                      |   |   |   |   |
| 6                                          | I will not perform oral care to residents if there is a risk of choking during the procedure.            |                                                                                                                      |   |   |   |   |
| 7                                          | I always perform oral care according to the instruction of my unit head or the protocol at my workplace. |                                                                                                                      |   |   |   |   |
| 8                                          | While performing oral care, I will do oral assessment for the resident.                                  |                                                                                                                      |   |   |   |   |
| 9                                          | I will refer residents with oral problems to a dentist.                                                  |                                                                                                                      |   |   |   |   |
| 10                                         | I will inform my senior when I have found oral problems in the resident.                                 |                                                                                                                      |   |   |   |   |
| 11                                         | I can find adequate equipment to perform oral care to residents in my workplace.                         |                                                                                                                      |   |   |   |   |

Thank you very much!
